# Supplementary material for: The Proteomic Composition and Organization of Constitutive Heterochromatin in Mouse Tissues
Source: MDPI journal article supplement (doi:10.3390/cells13020139), 2024-01-11
Supplement: s1 [file s1]

## Supplementary information

### Supplementary Figures

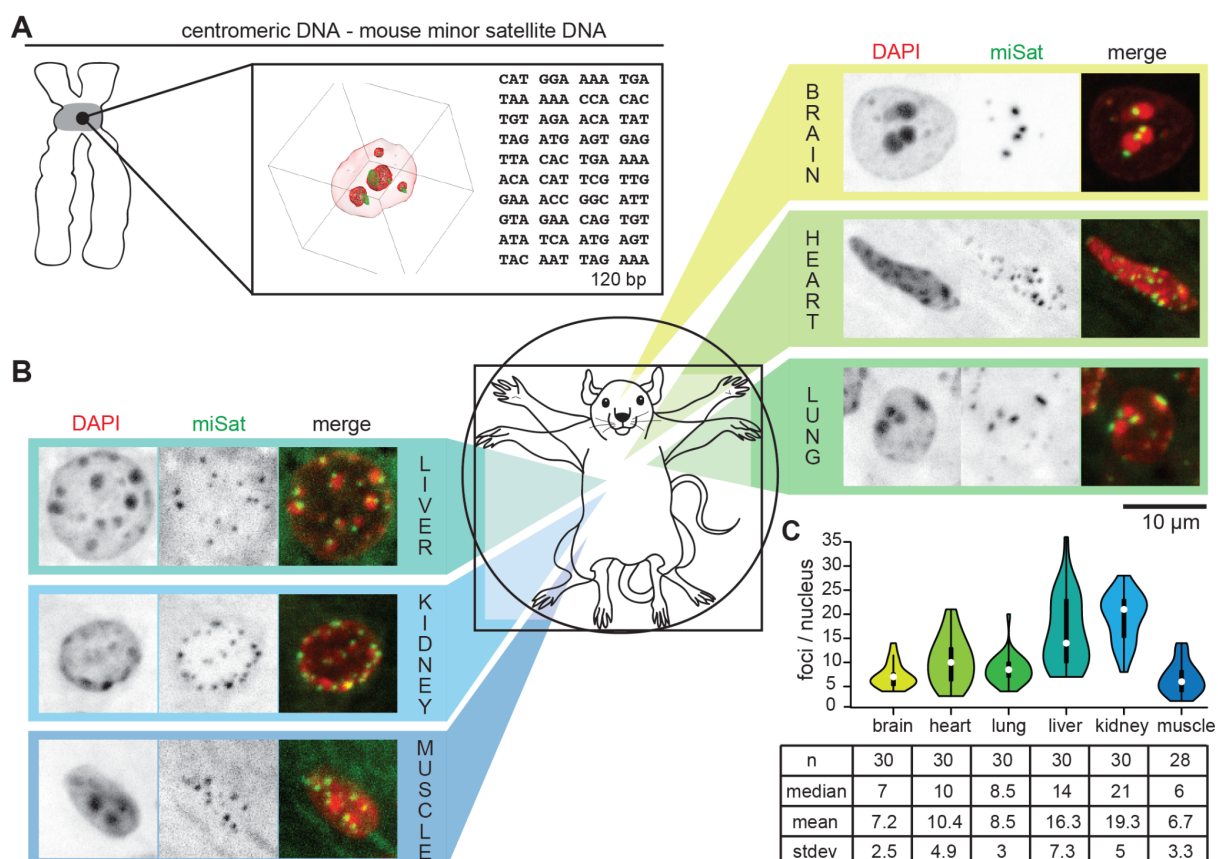

Figure S1. Centromeric heterochromatin organization in mouse tissues.

(A) Rotated view of 3D projection of minor satellite (centromeric) DNA fluorescence in situ hybridization (FISH; green) overlaid with the DNA stained with DAPI (red) and minor satellite DNA repeat sequences. (B) Minor satellite (miSat) DNA FISH (green) overlaid with DNA (red) in different mouse tissues as indicated. (C) Quantitation of minor satellite foci in different mouse organs. Violin plots represent the median foci number (white mark), spread (line; upper and lower quartile), the whiskers the 95 % interval and the rotated kernel density plot all possible values. Corresponding statistics for minor satellite foci number per nucleus was calculated by Volocity software after segmenting single foci.

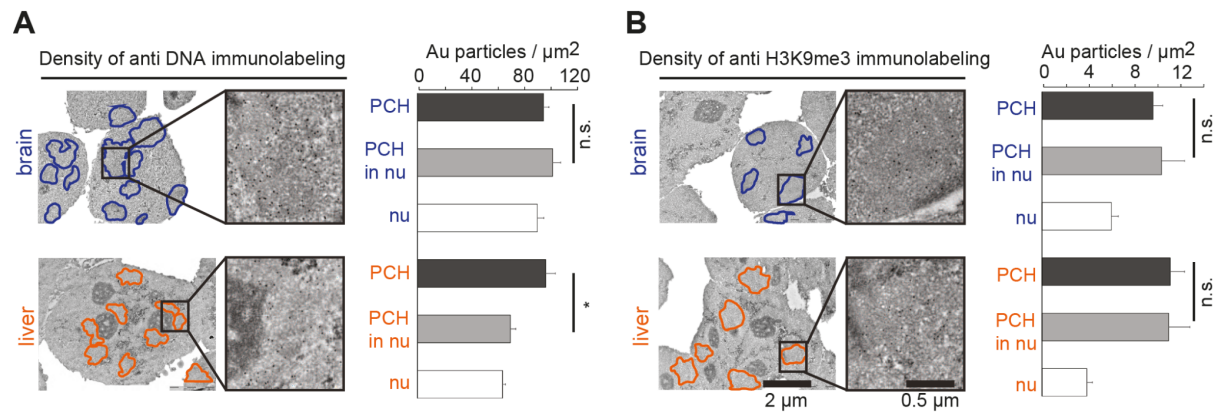

Figure S2. Electron microscopy characterization of pericentromeric heterochromatin organization in mouse tissues.

Immunolabeling using DNA (A) and H3K9me3 (B) antibodies and 10 nm colloidal gold particles-coupled secondary antibodies on ultrathin sections of isolated nuclei prepared from mouse liver and brain cells. Blue or orange lines encircle the area of the PCH. The right sides of the images represent the enlargement of a chosen PCH (marked by a black frame) showing the distribution of antibodies in the PCH region. Graphs showing colloidal gold immunolabeling density (Au particles/ $\mu\text{m}^2$ ) for DNA and H3K9me3 antibodies in each type of sample: nuclei (nu), PCH in isolated nuclei (PCH in nu) and isolated PCH (PCH) from both liver and brain cells. Gold nanoparticles were detected and counted using the ImageJ plug-in ThunderSTORM. Error bars: Mean  $\pm$  SEM, N = 11 – 17. The statistics are summarized in table S8.

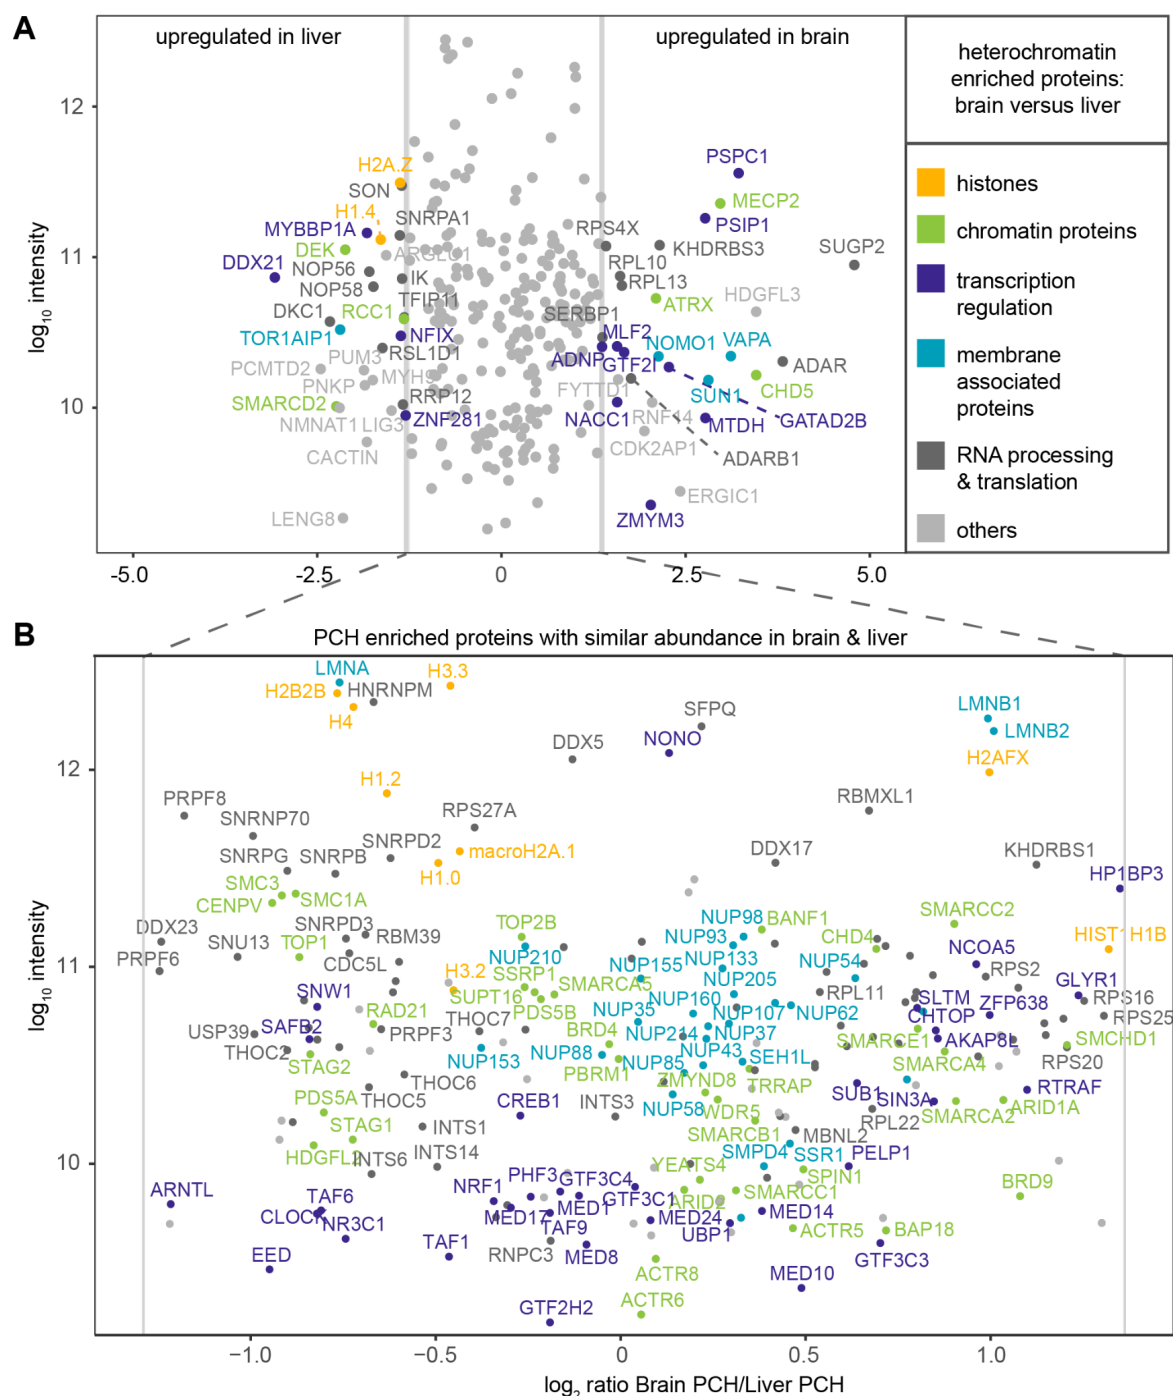

Figure S3. PCH enriched proteins in mouse tissues identified by quantitative mass spectrometry.

All proteins identified in three biological replicates and enriched in the PCH compared to the nuclei (see table S9) were used as input (Figure 4C). (A) The dot plot shows the  $\log_{10}$  intensity plotted against the  $\log_2$  ratio of brain PCH versus liver PCH. Proteins with equal abundance are depicted in gray, and proteins highly enriched in the brain or liver PCH (upper or lower 10%) were labeled and color-coded. The color code indicates the protein function manually assigned based on the UniProt webpage functional information. Histones are labeled in orange, chromatin proteins in green, proteins involved in transcriptional regulation in dark blue, membrane associated proteins in cyan, proteins involved in RNA processing or RNA-binding proteins in dark gray, and proteins not fitting into the categories in light gray. (B) Rescaled version of the dotplot shown in (A) focusing on the heterochromatin enriched proteins with similar abundance between brain and liver PCH. Color coding is as described in (A).



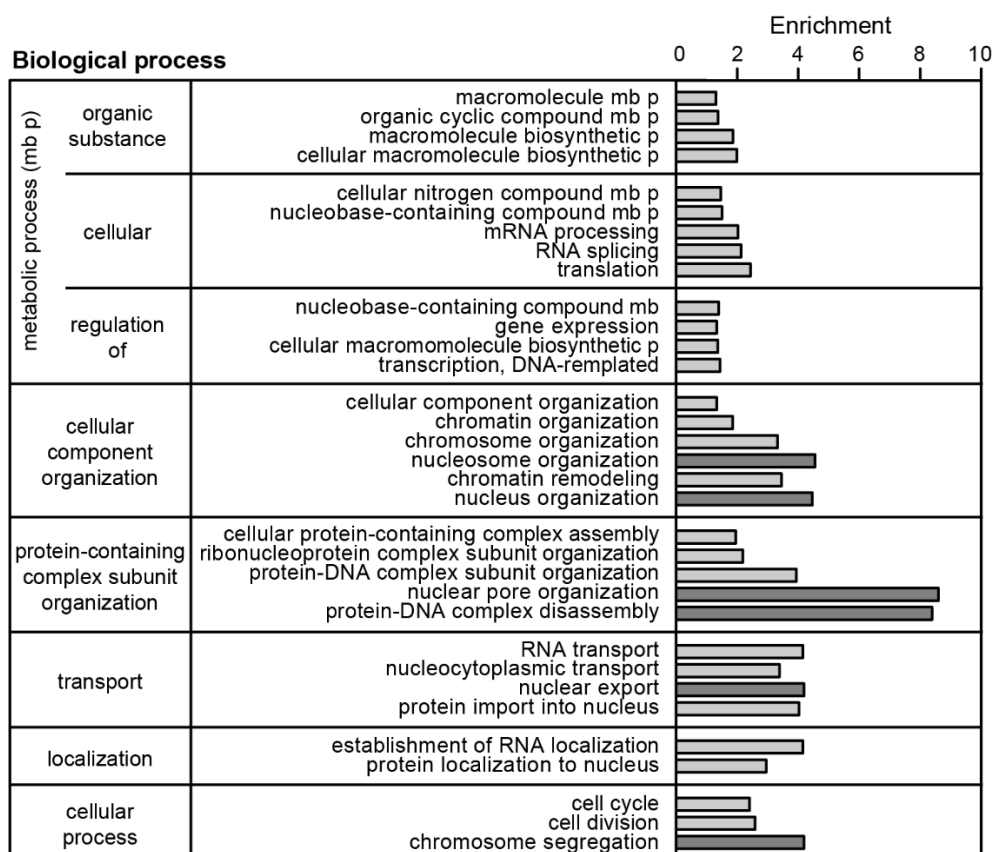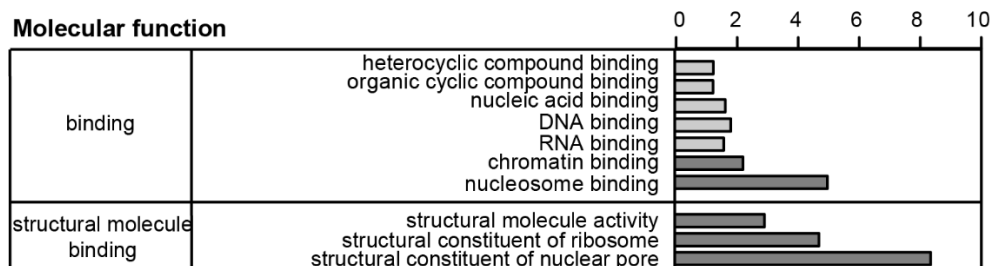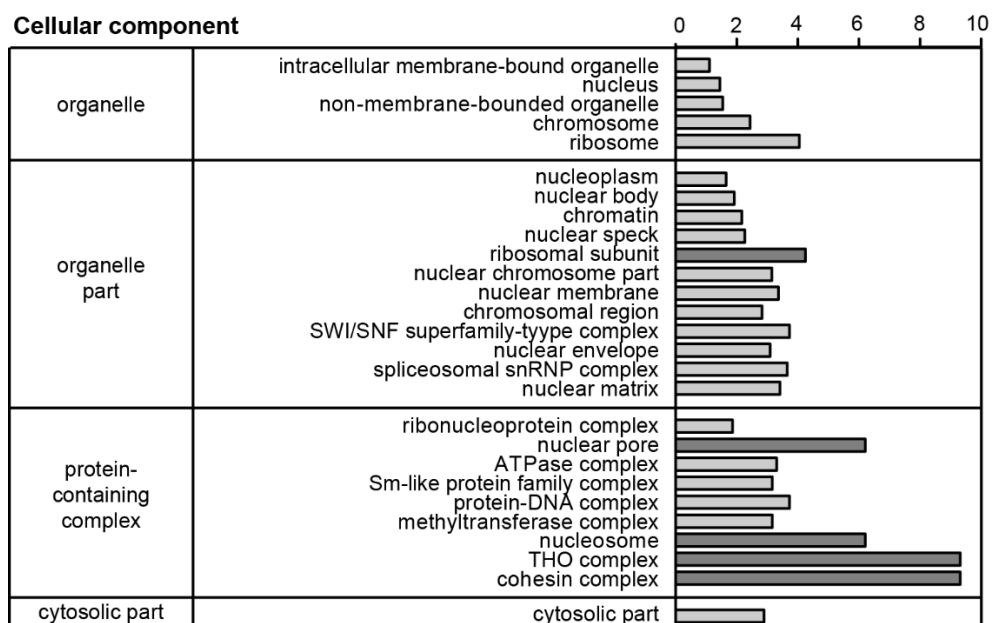

#### Figure S4. Gene ontology (GO) analysis of the PCH enriched proteins.

All PCH enriched protein hits in both brain and liver were used as input (Figure S3). The protein list was subjected to the GOrilla tool [53] for gene ontology analysis in the categories biological process, molecular function, and cellular component. The proteins enriched in heterochromatin were added as the target list, all identified proteins (without cut-off or filtering) as the background list. GO terms with a p-value lower than  $5 \times 10^{-5}$  were considered. The GO terms were grouped according to a common gene ontology term within the diagram of the GOrilla output and redundant terms were removed manually. Plotted is the number of genes in the GO term (b) as % of total genes in the target list (n) and the enrichment calculated by the GOrilla tool as  $(b/n)/(B/N)$  with b: number of genes in the target list associated with specific GO term; n: total number of genes in the target list; B: number of genes in the background list associated with specific GO term; N: total number of genes in the background list. The proteins with the highest enrichment in each category were highlighted in dark gray.

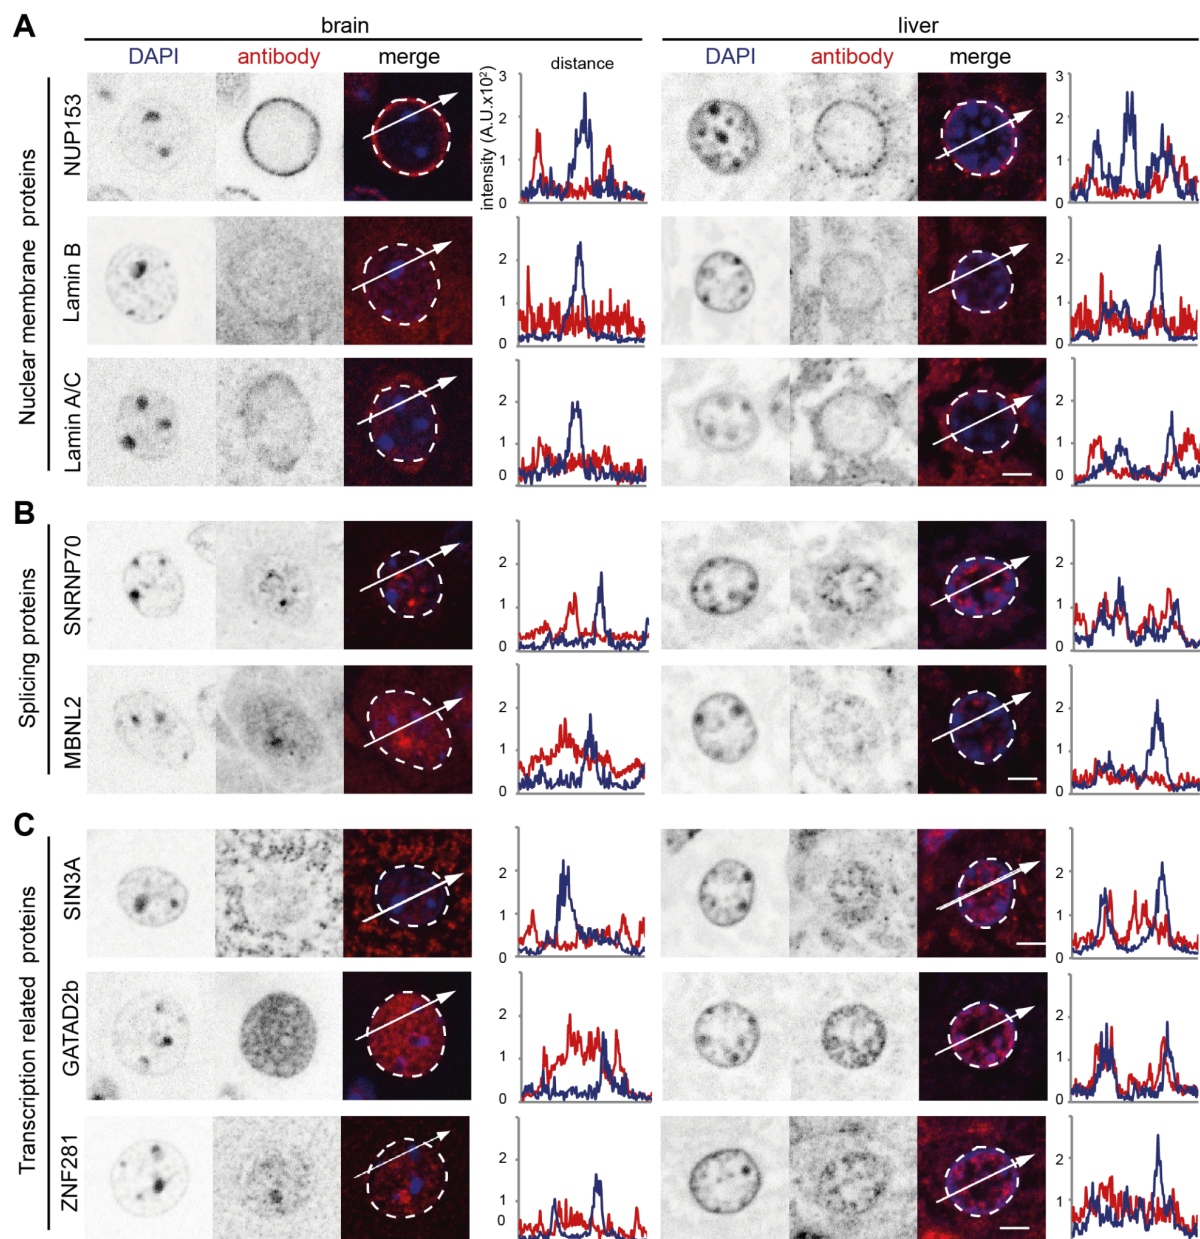

Figure S5: Localization of PCH enriched proteins with GO terms for nuclear membrane, splicing or transcription.

The candidates enriched to GO terms of nuclear membrane (A), splicing (B), or transcription regulation (C) were detected on mouse brain and liver tissue slices by immunofluorescence staining. The nuclear outlines are marked in white on the merged channel image. Line plots of the fluorescence intensity in arbitrary units (A.U.) plotted against the distance depict the colocalization of the antibody staining (red) with the DNA counterstain (DAPI, blue). Scale bar 5  $\mu$ m.

**A****Nuclear membrane proteins**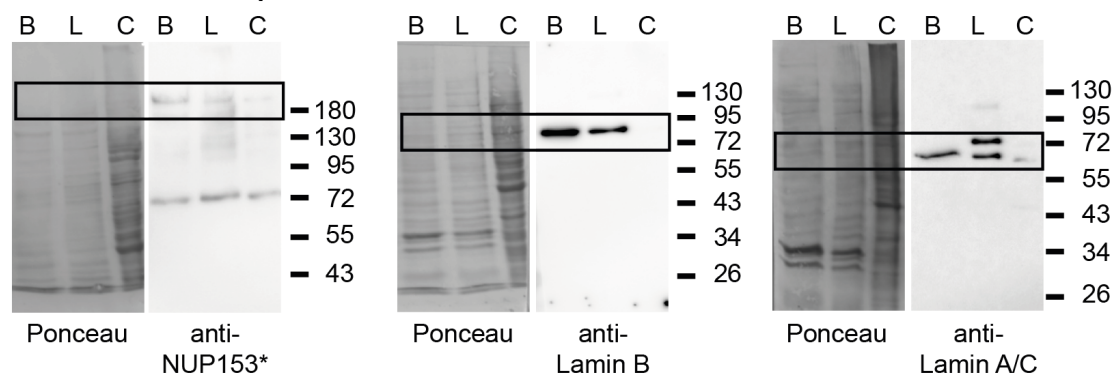**B****Splicing proteins**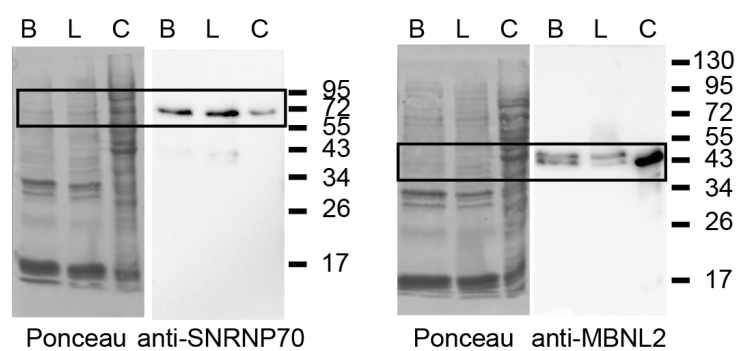**C****Transcription related proteins**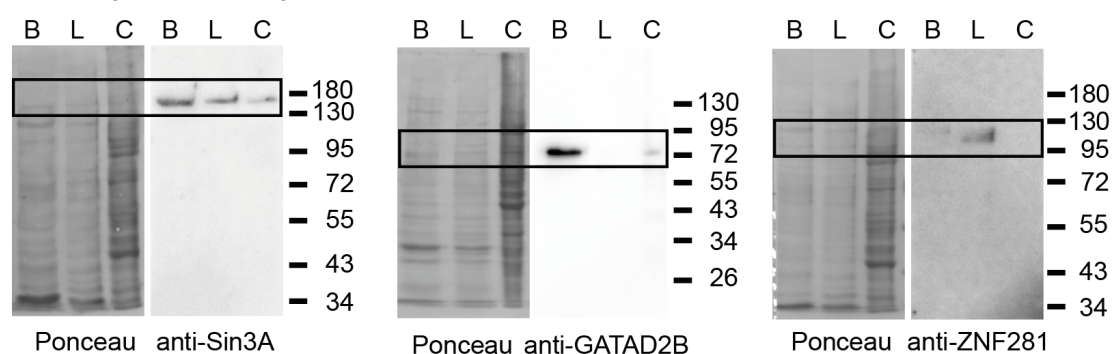

Figure S6. Nuclear abundance of PCH enriched proteins with GO terms for nuclear membrane, splicing or transcription.

The candidates enriched to GO terms of nuclear membrane (A), splicing (B), or transcription regulation (C) as shown in Figure S5 were detected on mouse brain and liver tissues by western blot analysis. B: brain nuclei lysate, L: liver nuclei lysate, C: whole cell lysate from mouse myoblasts. The protein transfer efficiencies were validated by Ponceau S staining on the left, and the antibody signals with chemiluminescence detection were shown on the right. The molecular weight marker indicates the protein weight in kDa and the black boxes mark the bands of interest.

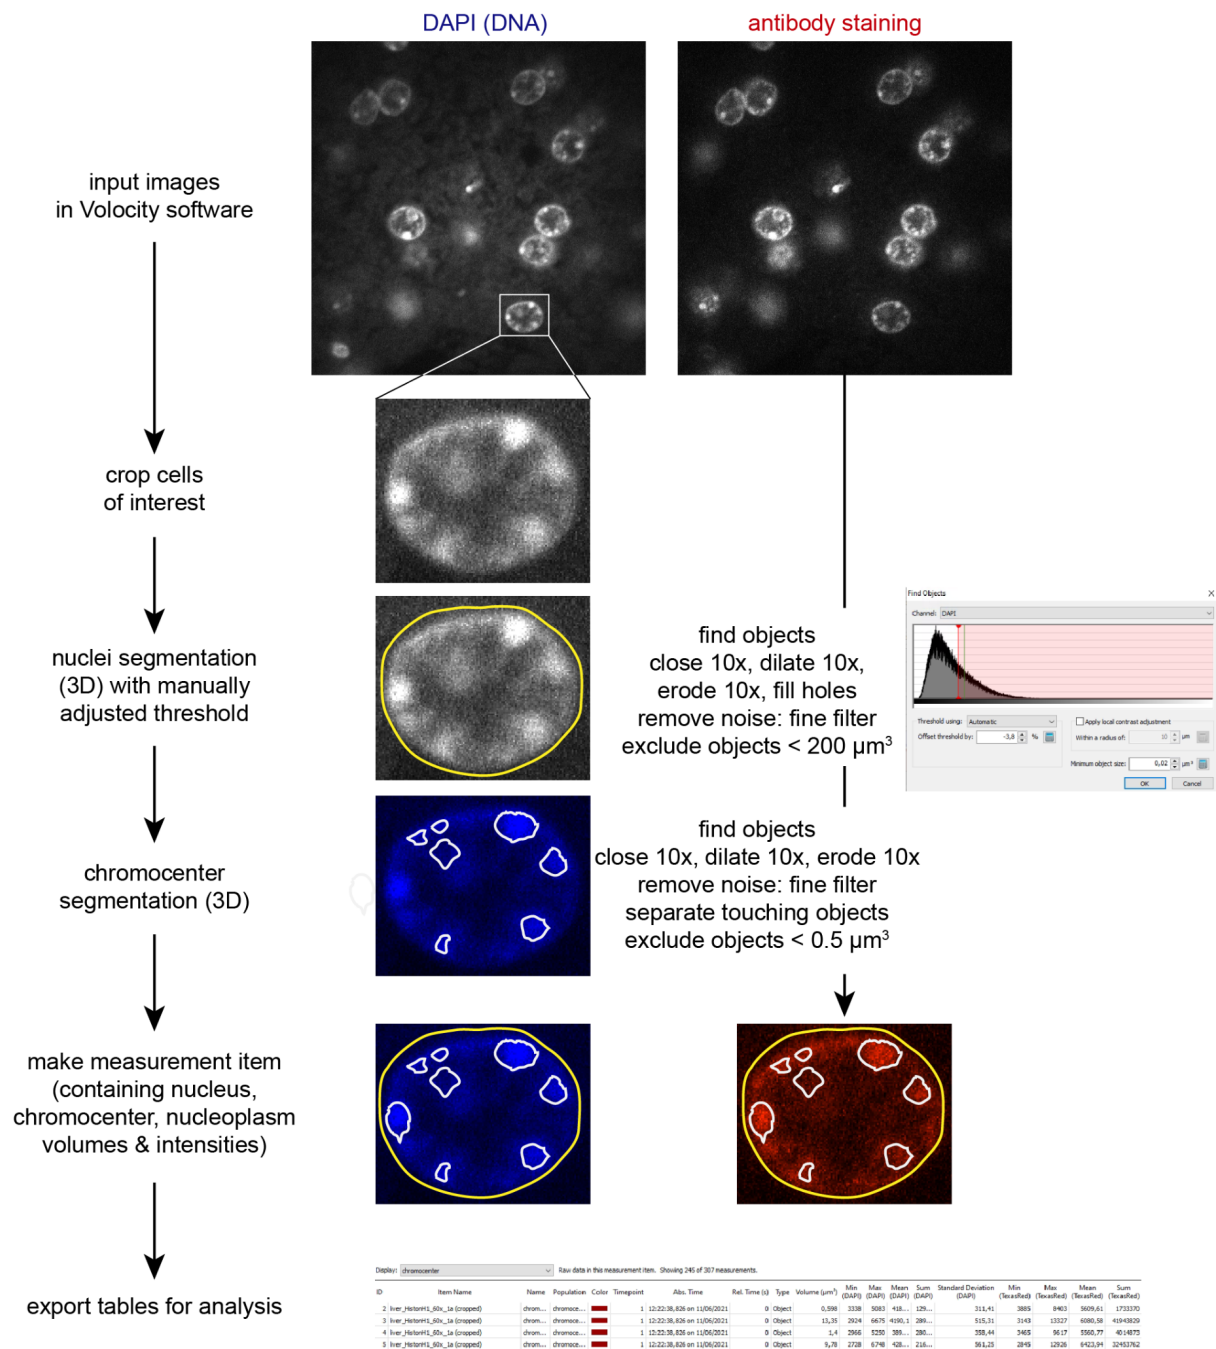

Figure S7. Workflow for nuclei and PCH segmentation after immunofluorescence staining.

The confocal z-stacks were obtained on an Ultra-Vox spinning disk system automatically saving the images in the Volocity software (Perkin Elmer). Based on the DAPI channel, individual cells were cropped, nuclei and PCH were segmented with the parameters described and a measurement item was created for each cell. The results were exported as tables for further analysis using the R software package.



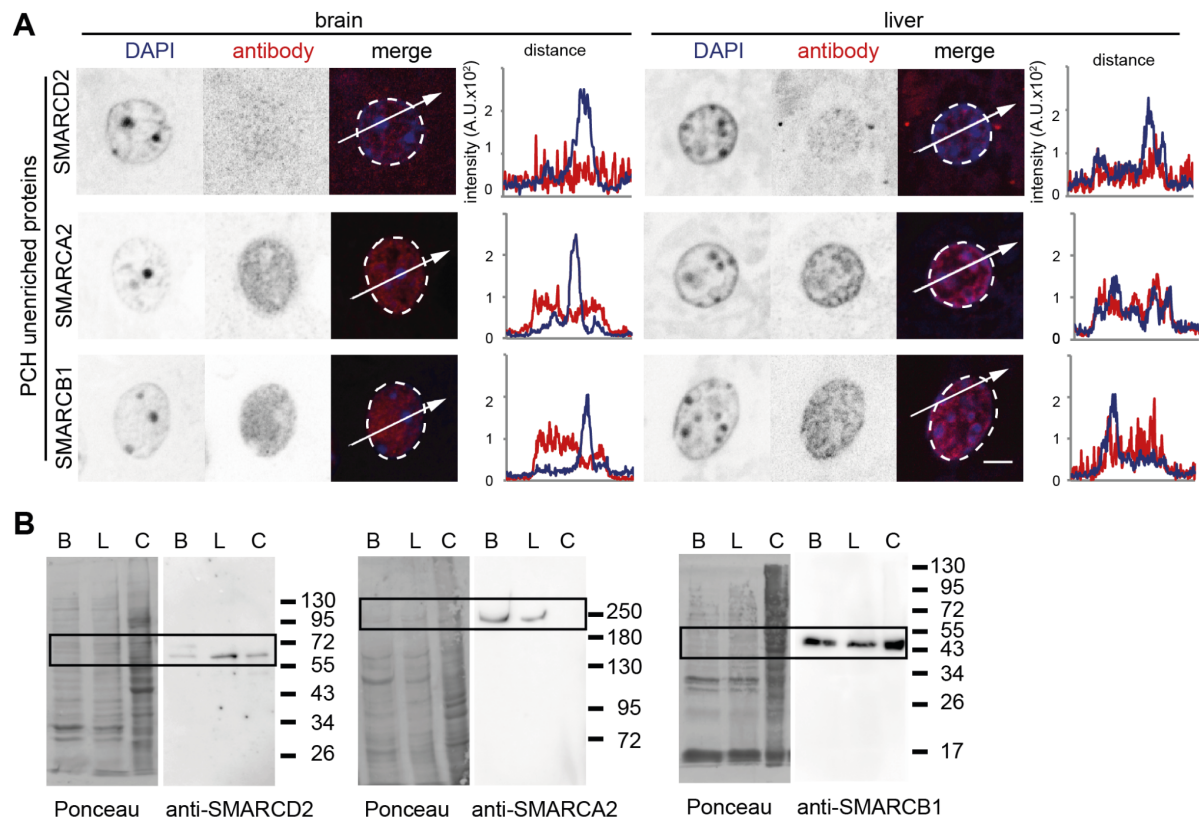

Figure S8. Candidates with GO terms for chromatin but no PCH accumulation in mouse brain and liver.

The candidates enriched for GO terms for chromatin were detected on mouse brain and liver tissue slices and the candidates with no PCH accumulation in both mouse brain and liver tissues were shown. (A) Immunofluorescence staining on mouse brain and liver tissue slices. The nuclear outlines are marked in white on the merged channel image. Line plots of the fluorescence intensity in arbitrary units (A.U.) plotted against the distance depict the colocalization of MeCP2 or H1 (red) with the DNA counterstain (DAPI, blue). Scale bar 5 μm. (B) Western blot analysis to detect the protein levels of proteins examined in (A) in brain and liver nuclei. B: Brain nuclei lysate; L: liver nuclei lysate; C: whole mouse myoblast cell lysate.

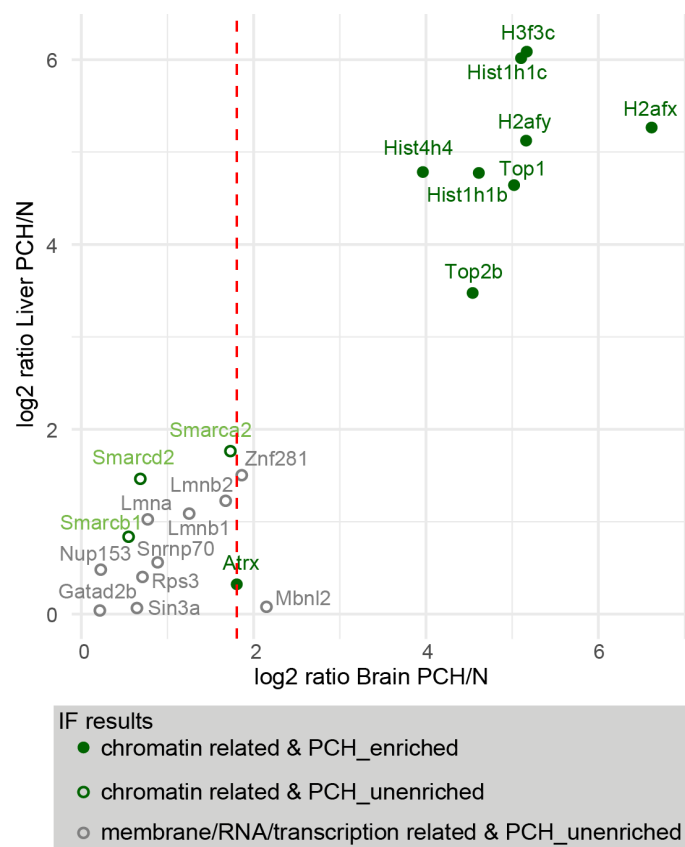

Figure S9. Cut-off strategy based on immunofluorescence staining and localization of candidates.

The candidates examined above (18 proteins) (Figure 5-6, Figure S5-S6, and Figure S8) were extracted from all PCH accumulated candidates (Figure S3). The dot plot shows the log2 ratio of protein intensities in liver PCH versus liver nuclei (N) plotted against the log2 ratio of protein intensities in brain PCH versus brain nuclei (N). The 18 candidates were classified into chromatin related (green circle) and chromatin unrelated (membrane, RNA, or transcription related) (gray circle) according to their GO terms (Figures S3-S4). The candidates were classified into PCH enriched (solid circles) and unenriched (hollow circles) based on the immunofluorescence staining (Figure 5, Figure S5 and Figure S8). Dashed red line represents the log2 ratio of ATRX intensities in brain PCH versus brain nuclei.

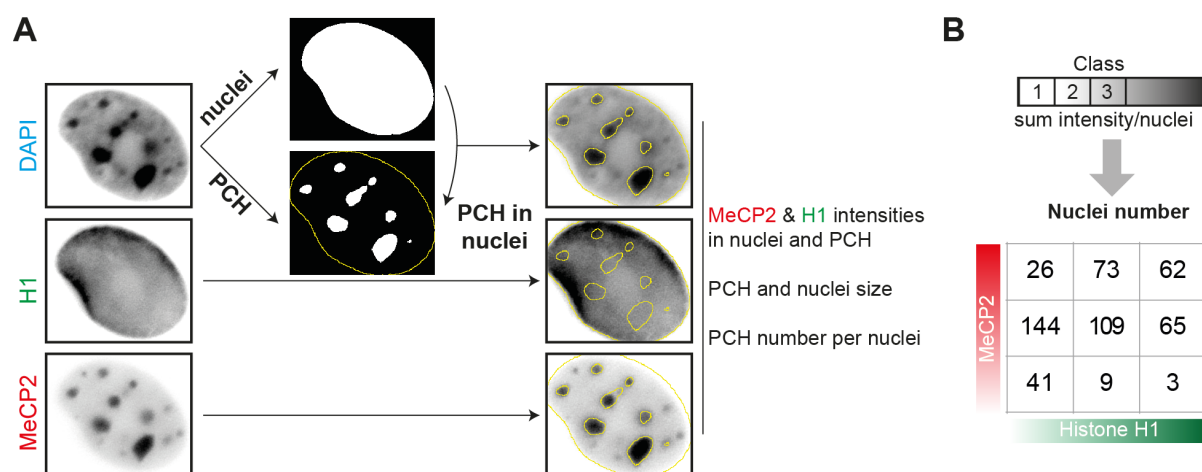

Figure S10: MeCP2 competes with histone H1.4 at PCH

(A) Workflow to analyze the MeCP2 and H1.4 levels in PCH of cultured C2C12 cells. The confocal images were obtained on the Nikon Crest spinning disk system and analyzed using FIJI software. The cell nuclei and corresponding PCH were recognized based on the DAPI intensities. The nuclei and PCH size, MeCP2 and H1.4 intensities in both nuclei and PCH, and PCH compartment numbers per nuclei were measured. (B) The cells were subgrouped into four groups based on the sum intensities after removing cells with extremely high or low signals. The cell number in each group was listed.



## Supplementary tables

Table S1: Oligonucleotide characteristics

| Name   | Sequence [5' → 3']      | Use | Reference                  |
|--------|-------------------------|-----|----------------------------|
| MajS-F | AAAATGAGAAACATCCACTTG   | PCR | Frauer et al., 2011 [54]   |
| MajS-R | CCATGATTTTCAGTTTCTT     | PCR | Frauer et al., 2011 [54]   |
| MinS-F | CATGGAAAATGATAAAAACC    | PCR | Lehnertz et al., 2003 [55] |
| MinS-R | CATCTAATATGTTCTACAGTGTG | PCR | Lehnertz et al., 2003 [55] |

Table S2: Primary and secondary antibody characteristics

| Reactivity                                           | Host   | Dilution       | Application | Cat #       | Company / Reference                       |
|------------------------------------------------------|--------|----------------|-------------|-------------|-------------------------------------------|
| Anti-ATRX (D-5)                                      | mouse  | 1:50           | IF / WB     | sc-55584    | Santa Cruz Biotechnology                  |
| Anti-mC                                              | mouse  | 1:100          | slot blot   | MMS-900P-B  | Eurogentec                                |
| Anti-DNA                                             | mouse  | 1:50           | EM          | CBL 61014   | Progen                                    |
| anti-B23                                             | mouse  | 1:500          | WB          | B0556       | Sigma                                     |
| Anti-Gatad2b                                         | rabbit | 1:200          | IF / WB     | AB-2641884  | invitrogen                                |
| Anti-Histone H1                                      | rabbit | 5 µg/ml0       | IF / WB     | sc-8030     | Santa Cruz                                |
| Anti-Histone macro H2A.1                             | rabbit | 1:200 / 1:500  | IF / WB     | 07-219      | upstate                                   |
| Anti-Histone H2AX                                    | rabbit | 1:200          | IF          | A300-083A   | Bethyl                                    |
| Anti-Histone H2AX                                    | rabbit | 1:1000         | WB          | ab20669     | abcam                                     |
| Anti-Histone H3.3 (EPR17899)                         | rabbit | 1:1000         | IF / WB     | ab176840    | abcam                                     |
| anti-H3K9me3                                         | rabbit | 1:350          | WB          | 39161       | Active Motif                              |
| Anti-Histone H4                                      | rabbit | 1:200          | IF / WB     | ab7311      | abcam                                     |
| Anti-Lamin A/C (XB 10)                               | mouse  | Undiluted TCSN | IF / WB     | -           | gift from Brian Burke                     |
| Anti-Lamin B (X223)                                  | mouse  | Undiluted TCSN | IF / WB     | 65147C      | Progen                                    |
| Anti-Mbnl2 (3B4)                                     | mouse  | 1:50           | IF / WB     | sc-136167   | Santa Cruz Biotechnology                  |
| Anti-MeCP2 (4H7)                                     | rat    | undiluted TCSN | IF / WB     | -           | Jost et al., 2011                         |
| Anti-mSin3A (K20)                                    | rabbit | 1:50           | IF / WB     | sc-994      | Santa Cruz Biotechnology                  |
| Anti-Nup153 (QE5)                                    | mouse  | 1:100          | IF / WB     | ab24700     | abcam                                     |
| Anti-SMARCA2/BRM                                     | rabbit | 1:100 / 1:1000 | IF / WB     | ab15597     | abcam                                     |
| Anti-SMARCB1/BAF47 (D8M1)                            | rabbit | 1:250 / 1:1000 | IF / WB     | 91735S      | Cell Signaling Technology                 |
| Anti-Smarcd2 (EPR20860-251)                          | rabbit | 1:100 / 1:1000 | IF / WB     | ab220164    | abcam                                     |
| Anti-Topoisomerase I (EPR5375)                       | rabbit | 1:100          | IF / WB     | ab109374    | abcam                                     |
| Anti-Topoisomerase II alpha + beta (TOP2B) (EPR5377) | rabbit | 1:100 / 1:1000 | IF / WB     | ab109524    | abcam                                     |
| anti-tubulin                                         | mouse  | 1:5000         | WB          | T9026       | Sigma                                     |
| Anti-U1 snRNP70 (C-3)                                | mouse  | 1:50 / 1:100   | IF / WB     | sc-390899   | Santa Cruz Biotechnology                  |
| Anti-Znf281 (D-8)                                    | mouse  | 1:50 / 1:100   | IF / WB     | sc-166933   | Santa Cruz Biotechnology                  |
| Anti-Halo                                            | mouse  | 1:1000         | IF          | G921A       | Promega GmbH                              |
|                                                      |        |                |             |             |                                           |
| Anti-mouse IgG Cy3                                   | donkey | 1:500          | IF          | 715-166-151 | Jackson ImmunoResearch Laboratories, inc. |
| anti-mouse IgG Cy5                                   | donkey | 1:250          | IF          | 715-175-150 | Jackson ImmunoResearch Laboratories, inc. |
| Anti-mouse IgG HRP                                   | sheep  | 1:5000         | WB          | NA 931      | Amersham Pharmacia Biotech                |

|                                        |        |         |    |             |                                           |
|----------------------------------------|--------|---------|----|-------------|-------------------------------------------|
| anti-rabbit IgG Cy3                    | donkey | 1:500   | IF | 711-165-152 | Jackson ImmunoResearch Laboratories, inc. |
| anti-rabbit IgG Cy5                    | donkey | 1:400   | IF | 711-175-152 | Jackson ImmunoResearch Laboratories, inc. |
| Anti-rabbit IgG HRP                    | goat   | 1:10000 | WB | A0545       | Sigma-Aldrich, Inc.                       |
| anti-mouse IgG colloidal gold coupled  | goat   | 1:20    | EM | 810.022     | Aurion                                    |
| anti-rabbit IgG colloidal gold coupled | goat   | 1:20    | EM | 810.011     | Aurion                                    |
| Anti-rat IgG Cy5                       | donkey | 1:250   | IF | 712-175-153 | Jackson ImmunoResearch Laboratories, inc. |

IF: immunofluorescence; WB: Western blot; HRP: horseradish peroxidase; TCSN: Tissue culture supernatant; EM: electron microscopy.

Table S3: Eukaryotic cell line characteristics

| Name  | Species      | Type     | Genotype | Reference                |
|-------|--------------|----------|----------|--------------------------|
| C2C12 | Mus musculus | myoblast | wildtype | Yaffe et al., 1977 [128] |

Table S4: Instrument and imaging system characteristics

| Microscope/ Company                                                            | Lasers/lamps                                              | Filters (ex. & em. (nm))                                           | Objectives/ lenses               | Detection system                         | Application                               |
|--------------------------------------------------------------------------------|-----------------------------------------------------------|--------------------------------------------------------------------|----------------------------------|------------------------------------------|-------------------------------------------|
| Widefield Axiovert 200 / Zeiss                                                 | HBO100 mercury lamp                                       | DAPI (300-400 & 410-510)                                           | 40x Plan-Neofluar NA 1.4 Oil Ph3 | 12-bit AxioCam mRM                       | Fluorescence imaging PCH isolation steps  |
| Widefield Axioplan / Zeiss                                                     | HBO100 mercury lamp                                       | DAPI (450-490 & 515-565)                                           | 40x Plan-Neofluar NA 1.3 Oil Ph3 | 12-bit AxioCam mRM                       | Fluorescence imaging PCH isolation steps  |
| UltraView VoX spinning disk on an inverted Nikon Ti-E microscope / PerkinElmer | Solid state diode lasers (405 nm, 561 nm, 640 nm)         | 405/568/640<br>405: 415–475<br>561: 580–650<br>640: 664–754        | 60x Plan-Apochromat NA 1.45 Oil  | cooled 14-bit Hamamatsu® C9100-50 EMCCD  | Confocal z-stack imaging of tissue slices |
| CREST X-light V2 spinning disk on an inverted Nikon Eclipse TiE2/PerkinElmer   | SPECTRA X LED<br>470/24 nm (196 mW)<br>640/30 nm (231 mW) | em.:<br>Quadbandpass (432/25 nm ; 515/25 nm; 595/25 nm; 730/70 nm) | CFI Apo TIRF DIC 63x NA 1.49 Oil | Nikon Qi2 751600 16.25 MPx               | Confocal imaging of cultured cells        |
| Amersham Al600 imager / GE Healthcare                                          | Chemiluminescence                                         | -                                                                  | -                                | 16-bit Peltier cooled Fujifilm Super CCD | Western Blot imaging                      |
| FEI Morgagni TEM                                                               | 80 kV in FEI                                              | -                                                                  | -                                | CCD camera MegaView III                  | Electron microscopy                       |

Table S5: Plasmid characteristics

| Name               | pc number | Fluorophore | Gene species | Promotor | Reference               |
|--------------------|-----------|-------------|--------------|----------|-------------------------|
| phMeCP2-halo       | pc3972    | Halo        | human        | CMV      | this study              |
| pEGFP-Histone H1.4 | pc2378    | EGFP        | human        | CMV      | Th'ng et al., 2005 [57] |

Table S6: Plot statistics Figures 3E, 5B and 9D

| Figure | Sample                | n  | Median | Mean   | Stdev | 95% CI | p-value   |
|--------|-----------------------|----|--------|--------|-------|--------|-----------|
| 3E     | Mean mC intensity in: |    |        |        |       |        |           |
|        | brain PCH             | 60 | 2841.5 | 2867.5 | 365.6 | -      | -         |
|        | brain euchromatin     | 60 | 2036.1 | 2049.8 | 111.3 | -      | -         |
|        | liver PCH             | 60 | 2899.8 | 2885.5 | 330.4 | -      | -         |
|        | liver euchromatin     | 60 | 2343.2 | 2389.6 | 296.4 | -      | -         |
| 5B     | ATRX brain            | 30 | 1.2    | 1.22   | 0.11  | -      | 1.11E-11  |
|        | ATRX liver            | 32 | 1.05   | 1.06   | 0.03  | -      |           |
|        | TopI brain            | 30 | 1.21   | 1.26   | 0.12  | -      | 3.96E-7   |
|        | TopI liver            | 31 | 1.42   | 1.42   | 0.07  | -      |           |
|        | TopII brain           | 35 | 1.4    | 1.42   | 0.28  | -      | 2.35E-07  |
|        | TopII liver           | 32 | 1.09   | 1.09   | 0.02  | -      |           |
|        | Histone H4 brain      | 33 | 1.21   | 1.21   | 0.1   | -      | 8.71E-10  |
|        | Histone H4 liver      | 32 | 1.43   | 1.43   | 0.15  | -      |           |
|        | Histone 3.3 brain     | 31 | 1.24   | 1.26   | 0.14  | -      | 0.8102    |
|        | Histone 3.3 liver     | 33 | 1.27   | 1.26   | 1.1   | -      |           |
|        | macro H2A.1 brain     | 35 | 1.33   | 1.32   | 0.12  | -      | 8.10E-11  |
|        | macro H2A.1 liver     | 32 | 1.15   | 1.15   | 0.05  | -      |           |
|        | Histone H2AX brain    | 34 | 1.27   | 1.29   | 0.15  | -      | 1.81E-07  |
|        | Histone H2AX liver    | 31 | 1.13   | 1.14   | 0.05  | -      |           |
| 9D     | Histone H1 brain      | 30 | 1.52   | 1.66   | 0.47  | -      |           |
|        | Histone H1 liver      | 31 | 1.47   | 1.52   | 0.28  | -      | 0.3934    |
|        | MeCP2 brain           | 30 | 1.68   | 1.69   | 0.26  | -      |           |
|        | MeCP2 liver           | 30 | 1.02   | 1.02   | 0.01  | -      | < 2.2e-16 |

Table S7: Heatmap plot statistics Figure 9E-F

| H1 classes | MECP2 classes | PCH mean area | H1 in PCH      | MeCP2 in PCH   |
|------------|---------------|---------------|----------------|----------------|
|            |               |               | Mean intensity | Mean intensity |
| 1          | 1             | 1.19          | 400.35         | 885.12         |
| 2          | 1             | 1.16          | 406.83         | 858.12         |
| 3          | 1             | 1.15          | 428.28         | 779.47         |
| 1          | 2             | 1.22          | 399.64         | 1101.32        |
| 2          | 2             | 1.21          | 403.89         | 1065.37        |
| 3          | 2             | 1.21          | 410.43         | 1000.15        |
| 1          | 3             | 1.34          | 402.92         | 1374.78        |
| 2          | 3             | 1.32          | 404.16         | 1317.89        |
| 3          | 3             | 1.27          | 407.48         | 1275.18        |

# Table list the mean values for heatmap plotting

Table S8: Plot statistics Figures S2

| Sample                              | n  | Median | Mean  | Stdev | 95% CI | p-value |
|-------------------------------------|----|--------|-------|-------|--------|---------|
| anti-DNA Au particles in liver:     |    |        |       |       |        |         |
| PCH isolated                        | 13 | -      | 97.2  | 26.2  | -      | < 0.05  |
| PCH in nuclei                       | 11 | -      | 70.4  | 13.8  | -      |         |
| nuclei                              | 11 | -      | 64.4  | 7.5   | -      |         |
| anti-DNA Au particles in brain:     |    |        |       |       |        |         |
| PCH isolated                        | 13 | -      | 95.4  | 15.1  | -      | n.s.    |
| PCH in nuclei                       | 14 | -      | 102.3 | 22.6  | -      |         |
| nuclei                              | 14 | -      | 90.8  | 18.1  | -      |         |
| anti-H3K9me3 Au particles in liver: |    |        |       |       |        |         |
| PCH isolated                        | 16 | -      | 11.2  | 5.0   | -      | n.s.    |
| PCH in nuclei                       | 16 | -      | 11.1  | 7.4   | -      |         |
| nuclei                              | 16 | -      | 3.9   | 1.9   | -      |         |
| anti-H3K9me3 Au particles in brain: |    |        |       |       |        |         |
| PCH isolated                        | 13 | -      | 9.7   | 3.1   | -      | n.s.    |
| PCH in nuclei                       | 17 | -      | 10.4  | 8.3   | -      |         |
| nuclei                              | 17 | -      | 6.1   | 2.4   | -      |         |

Table S9: Proteins enriched in heterochromatin identified by mass spectrometry.

| Protein symbol | Protein ID | log10 intensity | log2 ratio BC/LC | protein function             | enrichment category |
|----------------|------------|-----------------|------------------|------------------------------|---------------------|
| ACTA2          | P62737     | 10.57           | 1.07             | others                       | common              |
| ACTR5          | Q80US4     | 9.67            | 0.47             | chromatin                    | common              |
| ACTR6          | A0A0R4J009 | 9.23            | 0.06             | chromatin                    | common              |
| ACTR8          | Q8R2S9     | 9.52            | 0.09             | chromatin                    | common              |
| AHCTF1         | Q8CJF7     | 10.43           | -0.25            | others                       | common              |
| AKAP8L         | Q9R0L7     | 10.64           | 0.86             | transcription regulation     | common              |
| ALYREF         | O08583     | 11.10           | -0.15            | RNA processing & translation | common              |
| ARID1A         | A2BH40     | 10.32           | 1.03             | chromatin                    | common              |
| ARID2          | E9Q7E2     | 9.87            | 0.17             | chromatin                    | common              |
| ARNTL          | Q9WTL8     | 9.79            | -1.22            | transcription regulation     | common              |
| BANF1          | O54962     | 11.19           | 0.38             | chromatin                    | common              |
| BAP18          | Q9DCT6     | 9.66            | 0.72             | chromatin                    | common              |
| BRD4           | Q9ESU6     | 10.61           | -0.03            | chromatin                    | common              |
| BRD9           | A0A0R4J175 | 9.84            | 1.08             | chromatin                    | common              |
| CCDC47         | Q9D024     | 10.02           | 1.18             | others                       | common              |
| CD2BP2         | Q9CWK3     | 9.93            | 0.40             | RNA processing & translation | common              |
| CDC5L          | Q6A068     | 11.07           | -0.73            | transcription regulation     | common              |
| CENPV          | Q9CXS4     | 11.32           | -0.94            | chromatin                    | common              |
| CHD4           | Q6PDQ2     | 11.09           | 0.69             | chromatin                    | common              |
| CHTOP          | Q9CY57     | 10.68           | 0.85             | transcriptional regulation   | common              |
| CLOCK          | O08785     | 9.75            | -0.82            | transcriptional regulation   | common              |
| CMAS           | Q99KK2     | 10.92           | -0.47            | others                       | common              |
| CPSF4          | E0CXT7     | 9.79            | -0.31            | RNA processing & translation | common              |
| CREB1          | Q01147     | 10.24           | -0.27            | transcription regulation     | common              |
| CSTF3          | Q99LI7     | 10.68           | -0.26            | RNA processing & translation | common              |
| DDOST          | O54734     | 10.43           | 0.77             | membrane                     | common              |
| DDX17          | Q501J6     | 11.53           | 0.42             | RNA processing & translation | common              |
| DDX23          | D3Z0M9     | 11.13           | -1.24            | RNA processing & translation | common              |
| DDX5           | Q61656     | 12.05           | -0.13            | RNA processing & translation | common              |
| DDX50          | Q99MJ9     | 10.24           | 0.43             | RNA processing & translation | common              |
| DNAJA1         | P63037     | 10.57           | -0.68            | others                       | common              |
| DNAJA2         | Q9QYJ0     | 10.61           | 0.37             | others                       | common              |
| DNAJB4         | Q9D832     | 9.69            | -1.22            | others                       | common              |
| EED            | Q921E6     | 9.46            | -0.95            | transcription regulation     | common              |
| FARSA          | Q8C0C7     | 9.81            | 0.27             | RNA processing & translation | common              |
| GLE1           | Q8R322     | 9.65            | 0.30             | others                       | common              |
| GLYR1          | Q922P9     | 10.85           | 1.24             | transcriptional regulation   | common              |
| GNL3L          | Q6PGG6     | 9.89            | 0.48             | others                       | common              |
| GTF2H2         | Q9JIB4     | 9.19            | -0.19            | transcription regulation     | common              |
| GTF3C1         | Q8K284     | 9.88            | 0.04             | transcription regulation     | common              |
| GTF3C3         | Q3TMP1     | 9.60            | 0.70             | transcription regulation     | common              |
| GTF3C4         | Q8BMQ2     | 9.86            | -0.16            | transcription regulation     | common              |
| H1F0           | P10922     | 11.53           | -0.49            | histones                     | common              |

|               |          |       |       |                              |        |
|---------------|----------|-------|-------|------------------------------|--------|
| H2AFX         | P27661   | 11.99 | 1.00  | histones                     | common |
| H2AFY         | Q9QZQ8   | 11.59 | -0.43 | histones                     | common |
| H3F3C         | P02301   | 12.43 | -0.46 | histones                     | common |
| HDGFL2        | Q3UMU9   | 10.09 | -0.83 | chromatin                    | common |
| HIST1H1B      | P43276   | 11.09 | 1.32  | histones                     | common |
| HIST1H1C      | P15864   | 11.88 | -0.63 | histones                     | common |
| HIST2H2B<br>B | Q64525   | 12.39 | -0.77 | histones                     | common |
| HIST2H3C<br>2 | P84228   | 10.88 | -0.45 | histones                     | common |
| HIST4H4       | P62806   | 12.32 | -0.72 | histones                     | common |
| HP1BP3        | Q3TEA8   | 11.40 | 1.35  | chromatin                    | common |
| HSD17B12      | O70503   | 9.64  | 0.08  | others                       | common |
| INTS1         | Q6P4S8   | 10.19 | -0.54 | transcription regulation     | common |
| INTS10        | Q8K2A7   | 9.73  | -0.34 | RNA processing & translation | common |
| INTS14        | Q8R3P6   | 9.98  | -0.50 | RNA processing & translation | common |
| INTS3         | Q7TPD0   | 10.24 | -0.01 | transcription regulation     | common |
| INTS6         | Q6PCM2   | 9.95  | -0.67 | RNA processing & translation | common |
| ISY1          | Q69ZQ2   | 10.21 | -0.89 | RNA processing & translation | common |
| KHDRBS1       | Q60749   | 11.52 | 1.12  | RNA processing & translation | common |
| LAS1L         | A2BE28   | 10.00 | 0.19  | RNA processing & translation | common |
| LMNA          | P48678   | 12.44 | -0.76 | membrane associated          | common |
| LMNB1         | P14733   | 12.26 | 0.99  | membrane associated          | common |
| LMNB2         | P21619   | 12.20 | 1.01  | membrane associated          | common |
| LRRC59        | Q922Q8   | 10.50 | 1.02  | others                       | common |
| MBNL2         | Q8C181-4 | 10.17 | 0.47  | RNA processing & translation | common |
| MCM3AP        | Q9WUU9   | 9.95  | -0.14 | others                       | common |
| MED1          | Q925J9   | 9.84  | -0.11 | transcription regulation     | common |
| MED10         | Q9CXU0   | 9.37  | 0.49  | transcription regulation     | common |
| MED14         | A2ABV5   | 9.76  | 0.38  | transcription regulation     | common |
| MED17         | Q8VCD5   | 9.78  | -0.30 | transcription regulation     | common |
| MED24         | Q99K74   | 9.71  | 0.08  | transcription regulation     | common |
| MED8          | Q9D7W5   | 9.59  | -0.09 | transcription regulation     | common |
| MOGS          | Q80UM7   | 9.73  | 0.33  | membrane associated          | common |
| MYL12B        | Q3THE2   | 9.70  | 0.03  | others                       | common |
| MYL6          | Q60605   | 10.24 | 0.45  | others                       | common |
| NCOA5         | Q91W39   | 11.01 | 0.96  | transcription regulation     | common |
| NONO          | Q99K48   | 12.09 | 0.13  | transcription regulation     | common |
| NOSIP         | Q9D6T0   | 10.22 | -0.92 | others                       | common |
| NR3C1         | P06537   | 9.62  | -0.74 | transcriptional regulation   | common |
| NRF1          | Q3UXF4   | 9.81  | -0.34 | transcriptional regulation   | common |
| NSUN2         | Q1HFZ0   | 9.83  | -0.21 | RNA processing & translation | common |
| NUP107        | Q8BH74   | 10.71 | 0.29  | membrane associated          | common |
| NUP133        | Q8R0G9   | 10.99 | 0.28  | membrane associated          | common |
| NUP153        | E9Q3G8   | 10.59 | -0.38 | membrane associated          | common |
| NUP155        | Q99P88   | 10.94 | 0.05  | membrane associated          | common |
| NUP160        | Q9Z0W3   | 10.76 | 0.20  | membrane associated          | common |
| NUP205        | B9EJ54   | 10.86 | 0.31  | membrane associated          | common |

|        |            |       |       |                              |        |
|--------|------------|-------|-------|------------------------------|--------|
| NUP210 | Q9QY81     | 11.10 | -0.26 | membrane associated          | common |
| NUP214 | Q80U93     | 10.70 | 0.24  | membrane associated          | common |
| NUP35  | Q8R4R6     | 10.72 | 0.05  | membrane associated          | common |
| NUP37  | Q9CWU9     | 10.63 | 0.23  | membrane associated          | common |
| NUP43  | P59235     | 10.50 | 0.22  | membrane associated          | common |
| NUP54  | Q8BTS4     | 10.94 | 0.63  | membrane associated          | common |
| NUP58  | Q8R332     | 10.35 | 0.14  | membrane associated          | common |
| NUP62  | Q63850     | 10.80 | 0.46  | membrane associated          | common |
| NUP85  | Q8R480     | 10.46 | 0.17  | membrane associated          | common |
| NUP88  | Q8CEC0     | 10.55 | -0.05 | membrane associated          | common |
| NUP93  | Q8BJ71     | 11.11 | 0.30  | membrane associated          | common |
| NUP98  | Q6PFD9     | 11.15 | 0.33  | membrane associated          | common |
| NXF1   | Q99JX7     | 10.78 | -0.71 | others                       | common |
| PBRM1  | Q8BSQ9     | 10.53 | -0.01 | chromatin                    | common |
| PDS5A  | Q6A026     | 10.26 | -0.80 | chromatin                    | common |
| PDS5B  | Q4VA53     | 10.84 | -0.22 | chromatin                    | common |
| PELP1  | Q9DBD5     | 9.99  | 0.62  | transcription regulation     | common |
| PHF3   | B2RQG2     | 9.83  | -0.24 | transcription regulation     | common |
| PPIL2  | Q9D787     | 10.12 | -0.92 | others                       | common |
| PRPF3  | Q922U1     | 10.68 | -0.65 | RNA processing & translation | common |
| PRPF6  | Q91YR7     | 10.98 | -1.25 | RNA processing & translation | common |
| PRPF8  | Q99PV0     | 11.77 | -1.18 | RNA processing & translation | common |
| RAD21  | Q61550     | 10.71 | -0.67 | chromatin                    | common |
| RAE1   | Q8C570     | 10.79 | 0.31  | RNA processing & translation | common |
| RANBP2 | Q9ERU9     | 11.38 | 0.18  | others                       | common |
| RBM15  | Q0VBL3     | 10.59 | -0.76 | RNA processing & translation | common |
| RBM39  | Q8VH51-2   | 11.16 | -0.69 | RNA processing & translation | common |
| RBMXL1 | Q91VM5     | 11.79 | 0.67  | RNA processing & translation | common |
| RNPC3  | Q3UZ01     | 9.61  | -0.19 | RNA processing & translation | common |
| RPL10A | A0A3B2WBL1 | 10.60 | 0.61  | RNA processing & translation | common |
| RPL11  | Q9CXW4     | 10.87 | 0.54  | RNA processing & translation | common |
| RPL12  | P35979     | 10.65 | 0.17  | RNA processing & translation | common |
| RPL21  | O09167     | 10.74 | 1.20  | RNA processing & translation | common |
| RPL22  | P67984     | 10.28 | 0.68  | RNA processing & translation | common |
| RPL23  | P62830     | 10.97 | 0.56  | RNA processing & translation | common |
| RPL23A | P62751     | 10.96 | 0.84  | RNA processing & translation | common |
| RPL27  | P61358     | 10.82 | 0.77  | RNA processing & translation | common |
| RPL30  | P62889     | 10.51 | 0.53  | RNA processing & translation | common |
| RPL31  | P62900     | 10.84 | 0.80  | RNA processing & translation | common |
| RPL35A | O55142     | 10.65 | 1.15  | RNA processing & translation | common |
| RPL5   | P47962     | 11.06 | 0.78  | RNA processing & translation | common |
| RPL9   | P51410     | 10.70 | 0.60  | RNA processing & translation | common |
| RPN1   | Q91YQ5     | 10.65 | 1.03  | others                       | common |
| RPN2   | Q9DBG6     | 10.40 | 0.80  | others                       | common |
| RPS11  | P62281     | 10.87 | 0.80  | RNA processing & translation | common |
| RPS13  | P62301     | 10.63 | 1.06  | RNA processing & translation | common |

|         |          |       |       |                              |        |
|---------|----------|-------|-------|------------------------------|--------|
| RPS14   | P62264   | 10.64 | 0.68  | RNA processing & translation | common |
| RPS15   | P62843   | 10.61 | 0.75  | RNA processing & translation | common |
| RPS15A  | P62245   | 10.49 | 0.53  | RNA processing & translation | common |
| RPS16   | P14131   | 10.83 | 1.25  | RNA processing & translation | common |
| RPS19   | Q9CZX8   | 10.89 | 1.07  | RNA processing & translation | common |
| RPS2    | P25444   | 10.95 | 0.99  | RNA processing & translation | common |
| RPS20   | P60867   | 10.59 | 1.21  | RNA processing & translation | common |
| RPS23   | P62267   | 10.54 | 0.97  | RNA processing & translation | common |
| RPS25   | P62852   | 10.75 | 1.31  | RNA processing & translation | common |
| RPS27A  | P62983   | 11.71 | -0.39 | RNA processing & translation | common |
| RPS3    | P62908   | 11.11 | 0.72  | RNA processing & translation | common |
| RPS3A   | P97351   | 11.14 | 0.69  | RNA processing & translation | common |
| RPS5    | Q91V55   | 10.48 | 0.36  | RNA processing & translation | common |
| RPS6    | P62754   | 10.71 | 1.15  | RNA processing & translation | common |
| RPS7    | P62082   | 11.02 | 0.66  | RNA processing & translation | common |
| RTRAF   | Q9CQE8   | 10.38 | 1.10  | transcription regulation     | common |
| RUVBL1  | P60122   | 11.04 | 0.03  | transcription regulation     | common |
| RUVBL2  | Q9WTM5   | 11.12 | 0.42  | transcription regulation     | common |
| SAFB2   | Q80YR5   | 10.63 | -0.84 | transcription regulation     | common |
| SART1   | Q9Z315   | 10.87 | -0.62 | RNA processing & translation | common |
| SEH1L   | Q8R2U0   | 10.52 | 0.33  | membrane associated          | common |
| SENP3   | Q9EP97   | 9.72  | 0.71  | others                       | common |
| SF3B5   | Q923D4   | 10.69 | -0.84 | RNA processing & translation | common |
| SFPQ    | Q8VIJ6   | 12.22 | 0.22  | RNA processing & translation | common |
| SIN3A   | Q60520   | 10.32 | 0.85  | transcription regulation     | common |
| SLTM    | Q8CH25-2 | 10.79 | 0.80  | transcription regulation     | common |
| SMARCA2 | Q6DIC0   | 10.32 | 0.91  | chromatin                    | common |
| SMARCA4 | Q3TKT4   | 10.57 | 0.88  | chromatin                    | common |
| SMARCA5 | Q91ZW3   | 10.86 | -0.18 | chromatin                    | common |
| SMARCB1 | Q9Z0H3   | 10.22 | 0.36  | chromatin                    | common |
| SMARCC1 | P97496   | 9.86  | 0.31  | chromatin                    | common |
| SMARCC2 | Q3UID0   | 11.22 | 0.90  | chromatin                    | common |
| SMARCE1 | Q54941   | 10.69 | 0.80  | chromatin                    | common |
| SMC1A   | Q9CU62   | 11.37 | -0.88 | chromatin                    | common |
| SMC3    | Q9CW03   | 11.36 | -0.92 | chromatin                    | common |
| SMCHD1  | Q6P5D8   | 10.60 | 1.21  | chromatin                    | common |
| SMPD4   | Q6ZPR5   | 9.99  | 0.39  | membrane associated          | common |
| SNRNP70 | Q62376   | 11.66 | -0.99 | RNA processing & translation | common |
| SNRPB   | P27048   | 11.47 | -0.77 | RNA processing & translation | common |
| SNRPB2  | Q9CQI7   | 10.83 | -0.86 | RNA processing & translation | common |
| SNRPD1  | P62315   | 11.13 | 0.06  | RNA processing & translation | common |
| SNRPD2  | P62317   | 11.55 | -0.62 | RNA processing & translation | common |
| SNRPD3  | P62320   | 11.14 | -0.74 | RNA processing & translation | common |
| SNRPF   | P62307   | 10.93 | -0.61 | RNA processing & translation | common |
| SNRPG   | P62309   | 11.49 | -0.90 | RNA processing & translation | common |
| SNU13   | Q9D0T1   | 11.05 | -1.04 | RNA processing & translation | common |



|         |            |       |       |                              |        |
|---------|------------|-------|-------|------------------------------|--------|
| SNW1    | A0A0B4J1E2 | 10.80 | -0.82 | transcription regulation     | common |
| SPIN1   | Q61142     | 9.97  | 0.49  | chromatin                    | common |
| SSB     | P32067     | 11.44 | 0.20  | other                        | common |
| SSR1    | A0A286YCT4 | 10.10 | 0.46  | membrane associated          | common |
| SSRP1   | Q08943     | 10.90 | -0.26 | chromatin                    | common |
| STAG1   | Q9D3E6     | 10.12 | -0.72 | chromatin                    | common |
| STAG2   | O35638     | 10.56 | -0.84 | chromatin                    | common |
| SUB1    | P11031     | 10.41 | 0.64  | transcription regulation     | common |
| SUPT16  | G3X956     | 10.87 | -0.23 | chromatin                    | common |
| TAF1    | Q80UV9     | 9.53  | -0.46 | transcription regulation     | common |
| TAF6    | Q62311     | 9.76  | -0.81 | transcription regulation     | common |
| TAF9    | Q8VI33     | 9.75  | -0.19 | transcription regulation     | common |
| TCERG1  | Q8CGF7     | 11.02 | -0.60 | transcription regulation     | common |
| TECR    | Q9CY27     | 10.26 | 0.43  | others                       | common |
| TERF2   | O35144     | 9.70  | 1.30  | others                       | common |
| THOC1   | Q8R3N6     | 10.63 | -0.82 | RNA processing & translation | common |
| THOC2   | B1AZI6     | 10.58 | -0.90 | RNA processing & translation | common |
| THOC5   | A0A0R4J0J6 | 10.39 | -0.68 | RNA processing & translation | common |
| THOC6   | Q5U4D9     | 10.45 | -0.58 | RNA processing & translation | common |
| THOC7   | Q7TMY4     | 10.67 | -0.38 | RNA processing & translation | common |
| TMPO    | Q61033     | 10.77 | 0.82  | membrane associated          | common |
| TOP1    | Q04750     | 11.05 | -0.87 | chromatin                    | common |
| TOP2B   | Q64511     | 11.15 | -0.27 | chromatin                    | common |
| TRIP12  | G5E870     | 9.98  | 0.09  | others                       | common |
| TRRAP   | A0A1D5RLL4 | 10.48 | 0.35  | chromatin                    | common |
| UBP1    | Q811S7     | 9.70  | 0.30  | transcription regulation     | common |
| USP39   | Q3TIX9     | 10.66 | -0.99 | RNA processing & translation | common |
| WDR18   | Q4VBE8     | 10.38 | 0.35  | others                       | common |
| WDR5    | P61965     | 10.33 | 0.26  | chromatin                    | common |
| WRNIP1  | Q91XU0     | 10.62 | -0.32 | others                       | common |
| YEATS4  | Q9CR11     | 9.92  | 0.21  | chromatin                    | common |
| YTHDC1  | E9Q5K9     | 10.42 | 0.12  | RNA processing & translation | common |
| ZFP638  | A0A0N4SV80 | 10.76 | 1.00  | transcription regulation     | common |
| ZMYND8  | A2A483     | 10.36 | 0.23  | chromatin                    | common |
| ADAR    | Q99MU3     | 10.31 | 3.82  | RNA processing & translation | brain  |
| ADARB1  | Q91ZS8-2   | 10.19 | 1.76  | RNA processing & translation | brain  |
| ADNP    | Q9Z103     | 10.40 | 1.37  | transcription regulation     | brain  |
| ATRX    | Q61687     | 10.73 | 2.10  | chromatin                    | brain  |
| CDK2AP1 | O35207     | 9.84  | 1.94  | others                       | brain  |
| CHD5    | E9PYL1     | 10.22 | 3.46  | chromatin                    | brain  |
| ERGIC1  | Q9DC16     | 9.44  | 2.43  | others                       | brain  |
| FYTTD1  | Q91Z49     | 10.19 | 1.58  | others                       | brain  |
| GATAD2B | Q8VHR5     | 10.27 | 2.27  | transcription regulation     | brain  |
| GTF2I   | Q9ESZ8     | 10.37 | 1.67  | transcription regulation     | brain  |
| HDGFL3  | Q9JMG7     | 10.64 | 3.46  | others                       | brain  |
| KHDRBS3 | Q9R226     | 11.08 | 2.15  | RNA processing & translation | brain  |

|          |          |       |       |                              |       |
|----------|----------|-------|-------|------------------------------|-------|
| MECP2    | Q9Z2D6-2 | 11.36 | 2.97  | chromatin                    | brain |
| MLF2     | Q99KX1   | 10.41 | 1.57  | transcriptional regulation   | brain |
| MTDH     | Q80WJ7   | 9.93  | 2.77  | transcriptional regulation   | brain |
| NACC1    | Q7TSZ8   | 10.04 | 1.57  | transcriptional regulation   | brain |
| NOMO1    | Q6GQT9   | 10.34 | 2.13  | membrane associated          | brain |
| PSIP1    | Q99JF8   | 11.26 | 2.77  | transcription regulation     | brain |
| PSPC1    | Q8R326   | 11.56 | 3.22  | transcription regulation     | brain |
| RNF14    | Q9JI90   | 10.04 | 2.05  | others                       | brain |
| RPL10    | Q6ZVV3   | 10.87 | 1.61  | RNA processing & translation | brain |
| RPL13    | P47963   | 10.81 | 1.63  | transcription regulation     | brain |
| RPS4X    | P62702   | 11.07 | 1.42  | RNA processing & translation | brain |
| SERBP1   | Q9CY58-2 | 10.47 | 1.37  | RNA processing & translation | brain |
| SUGP2    | Q8CH09   | 10.95 | 4.79  | RNA processing & translation | brain |
| SUN1     | Q9D666-3 | 10.18 | 2.81  | membrane associated          | brain |
| VAPA     | Q9WV55   | 10.34 | 3.11  | membrane associated          | brain |
| ZMYM3    | Q9JLM4   | 9.35  | 2.03  | transcription regulation     | brain |
| ARGLU1   | Q3UL36   | 11.01 | -1.57 | others                       | liver |
| CACTIN   | Q9CS00   | 9.77  | -1.83 | others                       | liver |
| DDX21    | Q9JIK5   | 10.86 | -3.08 | transcription regulation     | liver |
| DEK      | Q7TNV0   | 11.05 | -2.12 | chromatin                    | liver |
| DKC1     | Q9ESX5   | 10.57 | -2.33 | RNA processing & translation | liver |
| H2AFZ    | P43274   | 11.49 | -1.38 | histones                     | liver |
| HIST1H1E | P0C0S6   | 11.12 | -1.64 | histones                     | liver |
| IK       | Q9Z1M8   | 10.86 | -1.35 | RNA processing & translation | liver |
| LENG8    | D3YWS8   | 9.27  | -2.15 | others                       | liver |
| LIG3     | P97386   | 9.98  | -1.49 | others                       | liver |
| MYBBP1A  | Q7TPV4   | 11.16 | -1.83 | transcription regulation     | liver |
| MYH9     | Q8VDD5   | 10.18 | -1.75 | others                       | liver |
| NFIX     | E9PUH7   | 10.48 | -1.37 | transcription regulation     | liver |
| NMNAT1   | Q9EPA7   | 10.00 | -2.20 | others                       | liver |
| NOP56    | Q9D6Z1   | 10.90 | -1.79 | RNA processing & translation | liver |
| NOP58    | Q6DFW4   | 10.80 | -1.74 | RNA processing & translation | liver |
| PCMTD2   | B0R0C7   | 10.26 | -2.45 | others                       | liver |
| PNKP     | G5E8N7   | 10.15 | -1.85 | others                       | liver |
| PUM3     | Q8BKS9   | 10.25 | -1.87 | others                       | liver |
| RCC1     | Q8VE37   | 10.59 | -1.32 | chromatin                    | liver |
| RRP12    | Q6P5B0   | 10.02 | -1.34 | RNA processing & translation | liver |
| RSL1D1   | Q8BVY0   | 10.40 | -1.62 | RNA processing & translation | liver |
| SMARCD2  | Q99JR8   | 10.01 | -2.24 | chromatin                    | liver |
| SNRPA1   | P57784   | 11.14 | -1.38 | RNA processing & translation | liver |
| SON      | H9KV00   | 11.47 | -1.36 | RNA processing & translation | liver |
| TFIP11   | Q9ERA6   | 10.60 | -1.32 | RNA processing & translation | liver |
| TOR1AIP1 | Q921T2   | 10.52 | -2.19 | membrane associated          | liver |
| ZNF281   | Q99LI5   | 9.95  | -1.30 | transcription regulation     | liver |

Filtered protein list obtained from the MaxQuant search against the UniProt database for *Mus musculus*. BC: brain PCH; LC: liver PCH. Protein function and enrichment category according to the classification in Figure S3.
